# Supplementary material for: Emulating grid-based forest carbon dynamics using machine learning: an LPJ-GUESS v4.1.1 application
Source: Copernicus journal article supplement (doi:10.5194/gmd-18-4317-2025), 2025-07-18
Supplement: Supplementary file 1 [file gmd-18-4317-2025-supplement.pdf]

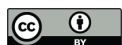

*Supplement of*

## **Emulating grid-based forest carbon dynamics using machine learning: an LPJ-GUESS v4.1.1 application**

**Carolina Natel et al.**

*Correspondence to:* Carolina Natel ([carolina.moura@kit.edu](mailto:carolina.moura@kit.edu))

The copyright of individual parts of the supplement might differ from the article licence.

## S1. LPJ-GUESS Model Modifications, Experimental Setup and Forcing Data

We used LPJ-GUESS version 4.1.1 (Nord et al., 2021) for our simulations. To ensure reproducibility, we provide the model code with necessary modifications used to generate data for emulation development through the Zenodo repository at: <https://zenodo.org/records/15065248>.

- **Modification 1:** Implemented an eXtended NetCDF input (cfxinput.h/cpp).
- **Modification 2:** Added output for annual climate data.
- **Modification 3:** Introduced a parameter to apply a fixed nitrogen deposition across simulations (fixed\_ndep and fixed\_ndep\_year).
- **Modification 4:** Enabled the output of spin-up period results (if\_spinup\_outputs).
- **Modification 5:** Added spinup\_clear2\_year parameter to control stand-replacing disturbances.

### Experimental Setup

Each LPJ-GUESS simulation began with a 500-year spin-up to stabilize carbon pools, using the 1901 atmospheric CO<sub>2</sub> concentration and repeating, detrended 1901–1930 climate data. Following the spin-up, a stand-replacing disturbance (via spinup\_clear2\_year) simulated a clear-cut, removing all vegetation and exposing soil. Vegetation residues were left on-site, contributing to litter and soil carbon pools. Post-disturbance, natural vegetation regrew under historical (1850–2014) and future (2015–2100) conditions. Land-use changes and fire disturbance were not modelled. In LPJ-GUESS, besides fire disturbances, we account for other external disturbances (e.g. windstorms, plant diseases etc) using a generic patch-destroying regime with a stochastic probability interval of the expected return time. Disturbance return time varies substantially across the global forest area (Pugh et al., 2019), and the interval we have chosen is a simplification that has been adopted in a number of previous studies using LPJ-GUESS and other vegetation models (Zaehle et al. 2008). The LPJ-GUESS parameter settings are presented below:

- Fire model: Disabled.
- Nitrogen deposition: Held constant at 2015 levels, following Lamarque et al. (2013).
- Disturbance interval: Default LPJ-GUESS setting of 100 years.
- Replicate number of patches: 50.
- Vegetation type: Potential natural vegetation only, to simplify ecosystem carbon responses and isolate climate-driven impacts.

### Forcing Data

The simulations used both historical (1850–2014) and future (2015–2100) climate data. Future runs began from the end state of the historical period.

- Climate Data: Bias-corrected CMIP6 data from the ISIMIP 3b project (Lange, 2019) was used, including five Earth System Models (ESMs) to cover climate sensitivity variations: IPSL-CM6A-LR, MPI-ESM1-2-HR, MRI-ESM2-0, GFDL-ESM4, and UKESM1-0-LL. Simulations included four Representative Concentration Pathways (RCPs): RCP2.6, RCP4.5, RCP7.0, and RCP8.5.
- Nitrogen Deposition: Set at 2015 levels based on Lamarque et al. (2013) data.
- Atmospheric CO<sub>2</sub> Concentrations: Aligned with observed CO<sub>2</sub> mixing ratios for each RCP scenario.

**Table S1. Random forests hyperparameters, showing the values tested during the hyperparameter grid search and the best values for each task (Carbon stocks: C stocks and Carbon fluxes: C fluxes).**

| Hyperparameter    | Description                                                         | Values                   | Best value (C stocks   C fluxes) |
|-------------------|---------------------------------------------------------------------|--------------------------|----------------------------------|
| n_estimators      | Number of trees in the random forest                                | 350, 500, 600, 700, 1000 | 1000   1000                      |
| max_samples       | The number of samples to draw from data to train each decision tree | 0.2, 0.4, 0.6, 0.8, 1.0  | 0.2   0.2                        |
| max_features      | Number of features to consider when looking for the best split      | 0.2, 0.4, 0.6, 0.8, 1.0  | 0.8   0.8                        |
| max_depth         | Maximum depth of the decision tree                                  | 200, 1000, 2000          | 200   200                        |
| min_samples_split | Minimum number of samples required to split an internal node        | 10, 20, 250, 400         | 250   250                        |

**Table S2. Neural network hyperparameters, showing the values tested during the hyperparameter grid search and the best values for each task (Carbon stocks: C stocks and Carbon fluxes: C fluxes).**

| Hyperparameter      | Name                | Description                                                                                                                   | Values           | Best value<br>(C stocks   C<br>fluxes) |
|---------------------|---------------------|-------------------------------------------------------------------------------------------------------------------------------|------------------|----------------------------------------|
| learning_rate       | Learning rate       | Controls the step size at each iteration while moving toward a minimum of the loss function.                                  | 0.001, 0.01, 0.1 | 0.001   0.001                          |
| layers              | Number of layers    | Defines the depth of the neural network. Each layer encapsulates a state (weights) and some computation.                      | 1, 2, 3          | 2   2                                  |
| neurons             | Number of neurons   | The basic computational units in a neural network layer. More neurons can capture more complex patterns.                      | 32, 64, 128      | 64   128                               |
| activation_function | Activation function | Introduces non-linearity into the network, allowing it to learn complex patterns.                                             | 'relu', 'tanh'   | 'tanh'   'relu'                        |
| dropout_rate        | Dropout rate        | A regularization technique to prevent overfitting. Determines the proportion of neurons randomly set to zero during training. | 0, 0.2, 0.5      | 0.2   0.2                              |
| batch_size          | Batch size          | Determines the number of samples processed before the model is updated. Affects training speed and stability.                 | 32, 64, 128      | 32   128                               |

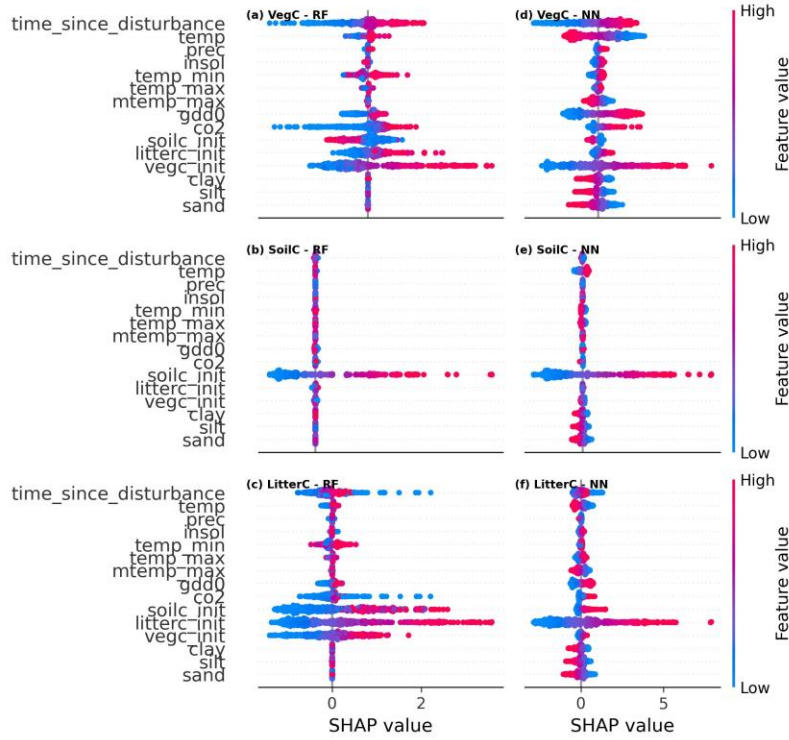

**Figure S1. SHAP values per feature for carbon stock predictions (vegetation carbon (VegC), soil carbon (SoilC), and litter carbon (LitterC)) using the (a - c) Random Forest (RF) and (d - f) Neural Network (NN) emulators. The Y-axis lists the features used in the model. The X-axis displays SHAP values, which quantify the impact of each feature on the model's prediction. Positive SHAP values indicate that a feature increases the prediction, while negative SHAP values suggest a decrease. The color gradient represents the feature values (red for high, blue for low). Each point on the plot corresponds to a single data point from the dataset, and its position along the X-axis shows the contribution of that feature to the prediction for that instance. For example, in 6a, low values (blue) of time elapsed since last disturbance (time\_since\_disturbance) decrease the predicted VegC, while high values (red) increase the predicted VegC by up to 2.feature values (red for high, blue for low).**

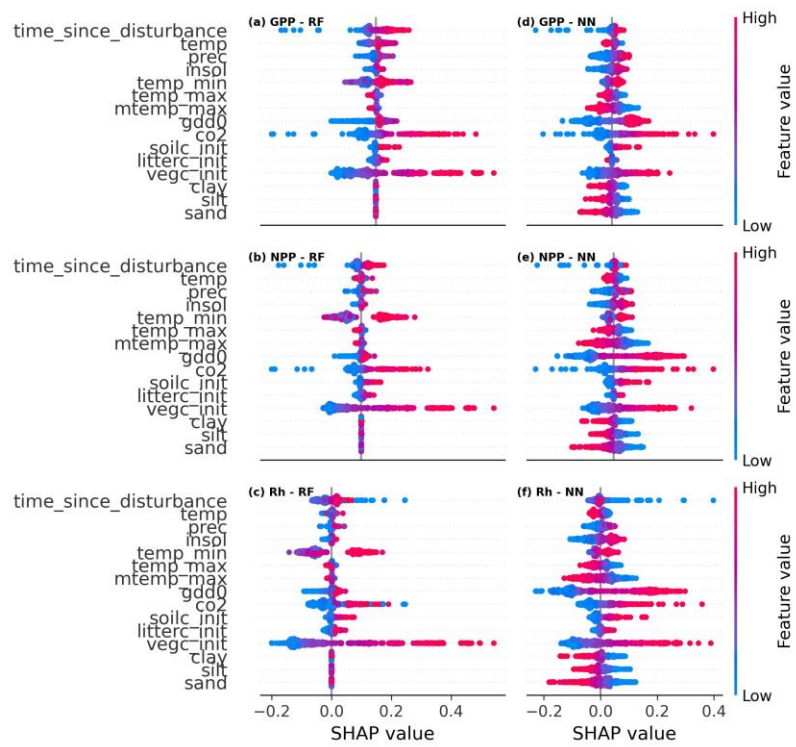

**Figure S2: SHAP values per feature for carbon flux predictions (gross primary productivity (GPP), net primary productivity (NPP), and heterotrophic respiration (Rh)) using the (a - c) Random Forest (RF) and (d - f) Neural Network (NN) emulators. For a detailed explanation of the SHAP plot, refer to the caption of Fig. S1.**
